# Supplementary material for: Seasonal and interannual variability of freshwater sources for Greenland's fjords
Source: Copernicus journal article supplement (doi:10.5194/egusphere-2024-3735), 2025-01-16
Supplement: Supplementary file [file egusphere-2024-3735-AC2-supplement.pdf]

## Reviewer 2

First of all, we would like to thank the reviewer for their time. We appreciate the feedback received which has greatly improved the manuscript. Responses to the issues raised (in blue) are written in black, and changes in the manuscript are written in red.

L52-54: This sentence is quite confusing. I suggest instead writing what the tundra contribution is for the whole model time period for all these studies (Bamber et al., 2018, Mankoff et al., 2020, Igneczi and Bamber, 2024). Something along the lines of:

“Bamber et al., 2018, estimated that tundra runoff added on average ?? % from 1958-2016, while Mankoff et al., 2020 found a larger number of.. Igneczi and Bamber (2024) estimated an even higher contribution of [..].”

Thanks for the suggestion. We have removed the relative contribution, because it was not specifically mentioned in these studies.

We changed the text in the revised MS to:

Bamber et al. (2018) estimated total Greenland tundra runoff at approximately 80 Gt yr<sup>-1</sup> (1958-2016), while Igneczi and Bamber (2024) found a higher number of 140-160 Gt yr<sup>-1</sup>.

L68: Consider whether it is really necessary to abbreviate freshwater as “FW” in the text. The less abbreviations, the easier it will be to read.

Agreed, we removed all abbreviations.

L80: Delete “MAR henceforth”, the abbreviation has already been given on the previous line “(MAR)”

Thanks for spotting this, it has been adjusted.

L93-98: If the RACMO simulations exist back to 1940 at a 5.5 km resolution, could you not use the whole time series by conducting the statistical downscaling of Noël et al. (2016)? Or what is the reason for only using 1958-present? Also, why did you choose to not statistically downscale the tundra?

That is a fair comment. Unfortunately, the RACMO run that extends back to 1940 has not yet been statistically downscaled. For consistency, we changed the RACMO tundra data back to be the same run as the RACMO run starting in 1958 (See Figure 2 in this document). This is now explained more clearly in the Methods.

Regarding the downscaling of tundra runoff, we clarified this in the revised text:

Whereas runoff from the GIC and GrIS can be easily statistically downscaled because of the strong elevation dependency of melt and hence runoff, as described by Noël et al. (2019), this is more challenging for the tundra and therefore not done yet. Tundra has much lower runoff values (from seasonal snow melt) than ice-covered regions (i.e. from ice and snow melt), therefore statistical downscaling based on elevation gradients must be applied separately. This has not been done yet, and therefore a 1 km runoff grid was obtained by nearest-neighbour interpolation of the original 5.5 km resolution data.

L98: Is there no dataset from MAR of the tundra runoff which you can compare to? This is the only variable where only one dataset is used

Good suggestion. In the revised MS we now include the annual MAR tundra runoff (See Figure 2: adjusted in this document), and also update this in Figure A3. We add the following text to the discussion:

We find that tundra runoff in RACMO is 36% higher than in MAR (175 vs 128 Gt yr<sup>-1</sup>, averaged over 1990-2023). Differences are especially large in NO and NE, where the difference is 8 Gt yr<sup>-1</sup> (47%) and 13 Gt yr<sup>-1</sup> (43%), respectively. Using MAR tundra runoff thus results in a decrease of tundra runoff contribution to the total freshwater input in fjords to 9% and 17%, respectively. This shows that in MAR the contribution of tundra runoff remains significant, but the large model differences require further investigation.

We also explored CARRA tundra runoff, but after consulting with the CARRA support team we decided not to use it for this application because the output fields called runoff did not represent (hydrological) runoff.

L102-103: Why don't you use the RACMO product from 1940 here?

Please see comment above on GIC and GrIS runoff (L93-98).

Table 1: Isn't the tundra runoff also interpolated onto a 1 km resolution? There is no arrow in the table like for the runoff.

It is bilinearly interpolated, but not statistically downscaled (please see our reply to the L93-98 comment above). We changed the caption to clarify this as follows:

Statistically downscaled data are indicated with an arrow.

Section 2.2: consider removing the adjustment you added to Slater et al. (2020), as it will be easier to compare to other studies if the same borders are used.

We think there are good reasons for the revisions we applied, please see our extensive answer to "RC 1: L129-131", repeated below:

"We understand your concern regarding the many different basin definitions that are being used in the community. The main reason for doing so is that, for the purpose of this paper, we are 'in-between' applications for land, ocean and ice. This study has the purpose of comparing freshwater sources from the perspective of fjords and climate, as opposed to hydrological basins (on land), ocean basins or glaciological basins. During our research phase, we concluded that using any of the existing basin definitions would not fit our research needs, and therefore a dedicated basin definition was deemed necessary, despite the disadvantage of creating another basin definition as you point out. We followed, as much as possible, existing definitions. We use as a basis the ocean-based basin divides used by Slater et al. (2020), which in turn represents an adjustment of the ice basin divides used by Mouginot et al. (2019). However, the area of CE is very small in Slater et al. (2020), as it was created as a 'transition' sector between colder and warmer ocean waters, while not cutting the Kangerlussuaq glacier in half (Fig. 1). This makes NE six times larger than CE, making the regions not comparable anymore. Furthermore, the Mouginot et al. (2019) - CE/SE boundary over the tundra cuts fjords

in half, which is unsuitable for our purposes. To compensate for both disadvantages, we chose to follow the 'ice divide' boundary from Mouginot et al. (2019) to differentiate between CE/SE. Over the tundra, we manually adjusted the CE/SE boundary to follow the hydrological basin boundaries over land (see Figure 1 in this document, and Zenodo database, see comment "In addition to using standard regions,"). Figure 6 in the MS confirms that our updated basins have the desired inter-distinguishable hydrological and climatological characteristics, indicating that the chosen regions effectively capture variance across Greenland. We will provide information (see below) to increase reproducibility, and to make the outcomes comparable to other studies. We revised the manuscript as follows:

Because this study considers freshwater fluxes into fjords, which differs from most hydrological, glaciological and oceanic applications, Greenland is divided into seven climatologically distinct regions (Fig 1): North (NO), North-East (NE), North-West (NW), Central-East (CE), Central-West (CW), South-West (SW) and South-East (SE). These are based on the seven land/ice basins from Slater et al. (2020) that in turn are based on the Mouginot et al. (2019) ice divides. We made one adjustment by moving the boundary between SE and CE northward, following the Mouginot et al. (2019) ice divide, to follow tundra hydrological catchments, as well as to make the regions more comparable in size."

L150-51: I'd remove this line: "the Total average FW flux since 2010 is 1239 ( $\pm$  180) Gt yr<sup>-1</sup>, calculated to compare to other studies in Sect. 4.1". The number can just be provided in Sec 4.1:

Thank you for this suggestion. Although we understand your point, we also believe this total average freshwater flux value is an important result that belongs in the Results section (L150-51), not just in the Discussion. We feel it's appropriate to introduce the core finding here where readers would expect to see it.

L164-65: change to "Basal melt accounts for a maximum of  $3 \pm 0.6$  % (March)", to clarify that march is the month with the highest contribution from basal melt

Thanks for the good suggestion! We incorporated the statement Basal melt accounts for a maximum of  $3 \pm 0.6$  % (March) into the text

Section 3.2: Information on the trend of the freshwater components are mostly given for NO. Can you write this for the other areas too?

There is one mention of a trend in this section, which we have removed this to make it more consistent with the description of the other areas.

L173-97: Since the discussion is mostly about how much each component contributes to the total runoff for each area, I would suggest changing the numbers in this section to percentages. This is a good suggestion, and the percentages can be found in Table A3.

L186: change "in line with earlier studies" to "in line with an earlier study" (or alternatively, have more than one reference)

We changed it to: in line with earlier work

L188: delete “now”

We changed this to:

In recent years,

L196: what does “(O (10 km))” mean?

We removed it.

L232-235: this is a results, I suggest moving to section 3.2

We moved this to section 3.2:

Annual freshwater fluxes show large variations between the regions, but on average fluxes per sector are 251 Gt yr<sup>-1</sup> (SE), 178 Gt yr<sup>-1</sup> (SW), 179 Gt yr<sup>-1</sup> (CE), 183 Gt yr<sup>-1</sup> (CW), and for the northern regions 119 Gt yr<sup>-1</sup> (NE), 146 Gt yr<sup>-1</sup> (NW), and 88 Gt yr<sup>-1</sup> (NO) between 1990 through 2023 (Fig. 4).

L235-36: “The average annual rate is slightly smaller than the total Arctic FW flux found by Bamber et al. (2018) (1300 Gt yr<sup>-1</sup> since 2010), which included non-Greenland ice caps.” - I would delete this sentence, since it is not calculated for the same region.

Indeed, this study does not cover the same region, but for context we still find it relevant to compare, e.g. as an upper bound. We now mention this specifically in the revised text as:

The average annual rate is slightly smaller than the total Arctic freshwater flux found by Bamber et al. (2018) (1300 Gt yr<sup>-1</sup> since 2010), which included non-Greenland ice caps. The region we study is a subset of the broader Arctic region analyzed by Bamber et al. (2018), making their estimate useful for context and as an upper bound for our values.

Section 4.1: The results could also be compared to Mankoff et al. (2020)

We have changed the text to the following:

We find higher values for tundra runoff than Bamber et al. (2018) (150 vs 80 Gt yr<sup>-1</sup>), and then Mankoff et al. (2020) (100-130 Gt yr<sup>-1</sup>).

L236-37: “GrIS runoff between 2010-2016 is higher in Bamber et al. (2018) and Igneczi and Bamber (2024) than estimated in this study.” → this sentence is too vague, please provide numbers. And why is it only compared for 2010-16, aren’t both studies for longer periods?

We agree that this was unclear. To clarify this, we changed the text in the revised manuscript to:

Average annual rates are compared for 2010-2016, a period with a relatively smaller trend than preceding years and covered by all studies in this comparison.

L239: which period is the comparison with bamber et al. (2018) from?

Please see comment above.

L240-41: “.. similar to values found in this study using RACMO output.” - this is too vague, please provide the numbers

The numbers are given in results in section 3.1 L147. We will refer back to this section:

We find higher tundra runoff than Bamber et al. (2018) (150 vs 80 Gt yr<sup>-1</sup>). Igneczi and Bamber (2024) estimated a total tundra runoff based on MAR between 140-160 Gt yr<sup>-1</sup> (1950-2021), similar to values found in this study using RACMO output (Sect. 3.1).

Section 4.2: I am not sure what the added value of the MoA is here. Since you are discussing the fraction of the total runoff, it seems obvious that regions with less melt will have a higher contribution from the solid ice discharge and regions with high melt will have a smaller contribution from the solid ice discharge. And regions with high melt will have a higher MoA, while regions with less melt will have a smaller one. So MoA does not seem to provide any additional information on what is actually happening beyond the obvious – or do I misunderstand what the meaning of the parameter is? Please clarify

Thanks, we will in the revised text better explain what the added value of the MoA analysis is. Please also see our answer to “RC 1: Sect 2.3” or changes to MS repeated below:

“Sect 2.3: The MoA ratio has been used previously in firm studies to determine the climatic conditions under which melt would generate runoff in the accumulation zone. Previous work has identified a theoretical MoA ratio threshold between 0.6 and 0.7, indicating the onset of runoff (Pfeffer et al., 1991; Braithwaite et al., 1994). More recently, MoA has been used to predict when melt ponding starts on Antarctic ice shelves ( van Wessem et al., 2023). In this study, MoA is used as a climatological indicator over the ice sheet, which we hypothesise is highly relevant for the partitioning between solid ice discharge and liquid water runoff into fjords. MoA does not directly depend on runoff, but on melt as well as snowfall; the relative regional sizes of ablation and accumulation areas and the potential for meltwater buffering (through snowfall) also become important.

L255: To our knowledge, no studies have identified a strong link between MoA and freshwater input fractions in Greenland fjords. In contrast, freshwater input fractions into fjords poorly correlate with temperature, melt or snowfall. This novel result will facilitate the interpretation of e.g. future changes in the distribution of freshwater fluxes in terms of climate change.”

L251-52 / Figure 6(c-d): I am not sure what the point is of Figure 6c, d. Since runoff and ice discharge are the main contributors, won't these always have a linear relationship? if there is a high contribution from ice discharge (e.g. 70%), of course the contribution from runoff has to be low. And when there is a high contribution from runoff, the contribution of ice discharge cannot be high. I suggest deleting this sentence/these figures, unless there is something important I am missing?

We clarify in the revised text as follows: Furthermore, the regional fractions to total freshwater input of both GrIS and tundra runoff decrease with increasing fraction of solid ice discharge (Figs. 6c,d). Yet, no such relation is found for fraction of GIC runoff or precipitation. There are more sources than solid ice discharge and meltwater runoff alone, such as ice cap runoff,

tundra runoff and precipitation. This means that the relationship between two sources is not a priori linear, and we find that there is such a relation between all pairs of source fractions.

L262: add the relative distribution in Bamber et al. (2018)

We have change the text as follows:

Annual mean tundra runoff is on average 15% of the total runoff (1990-2023), exceeding the relative contributions estimated in previous work (9-11% estimated from Fig. 3 in Bamber et al., 2018). Seasonal contributions from tundra runoff and fjord precipitation to Greenland-wide freshwater fluxes can reach up to 35% and 11%, respectively,

L264: what is a “relatively high contribution”? Can you provide percentages?

We have changed the text to include percentages:

The south and east of Greenland have relatively high precipitation rates (Fettweis et al., 2020; van Dalum et al., 2024), which leads to the regions CE, SE, SW, and NE having a relatively high contribution of fjord precipitation to the total freshwater input (monthly percentages up to 22, 12, 20, 22%, respectively), especially from October until April, when runoff is small (Fig. 5).

L337-341: please cite the datasets in addition to the papers

We have now included citations for the data sets with a DOI in the paper.

Figure 3: why does (a) and (b) show 1990-2004 and 2005-2023 instead of the whole period? This is not discussed in the text. I suggest either only showing the values for the whole time period (1990-2023), or alternatively add some text about the difference between the two time periods.

Thanks for pointing this out, we have changed the text:

There is an increase in summer GrIS runoff in the latter half of the period (2005-2023) compared to the first half (1990-2004), along with a rise in monthly solid ice discharge (Fig. 3a).

Figure 6: I think the “R” on the figures should be “r”, like in the caption?

Yes thanks for pointing it out, we changed this.

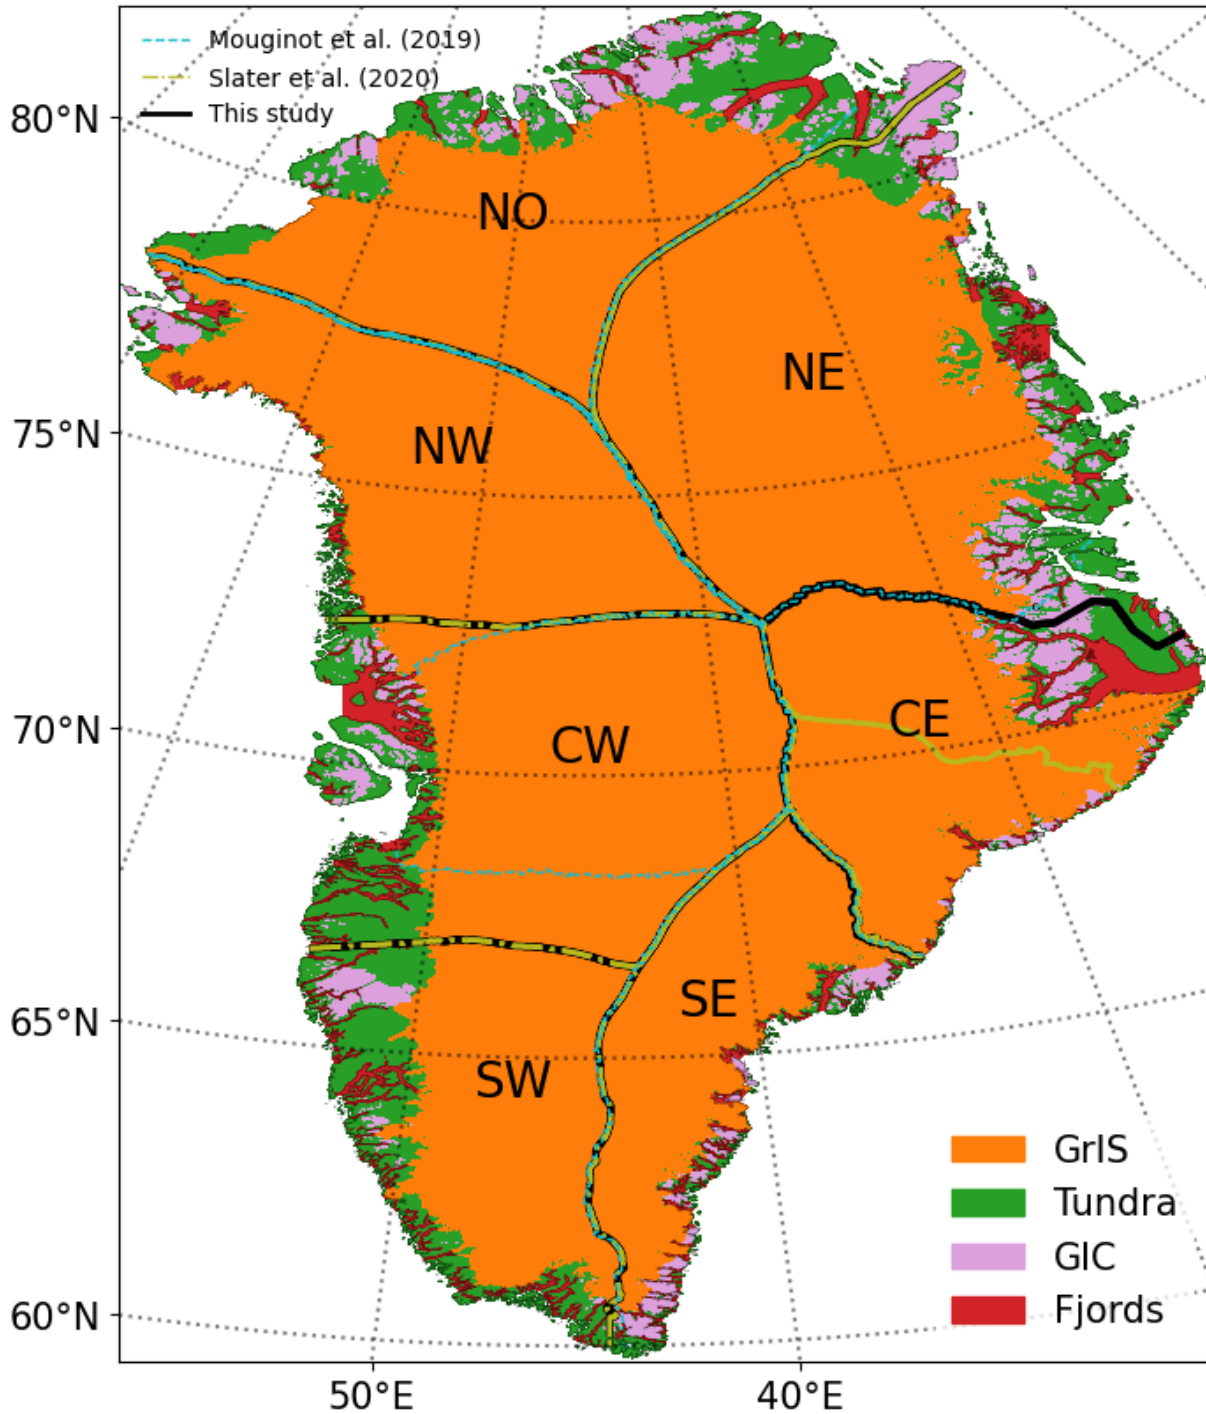

Figure 1: Masks of different surface types at 1x1 km<sup>2</sup> resolution representing: the contiguous ice sheet (GrIS, orange), tundra (green), glaciers and ice caps (GIC, violet) and fjords (red). Solid black lines delineate the seven climatological regions used in this study, dashed olive green lines delineate the Slater et al. (2020) basins and dashed cyan blue lines delineate the Mouginot et al. (2019) basins (see legend in the upper left corner).



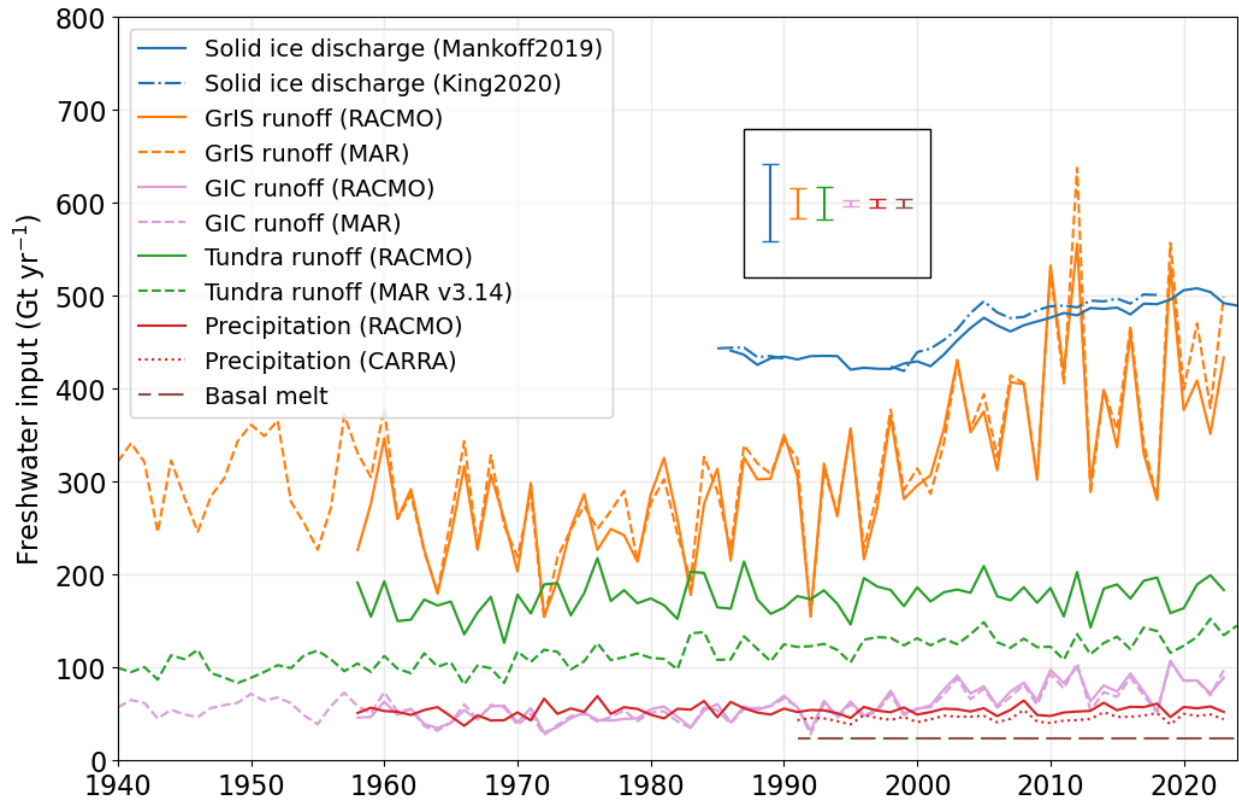

*Figure 2: Time series of annual, Greenland total freshwater input into fjords for different components between 1940/1958-2023. Error bars represent typical uncertainty per freshwater source.*



## References:

- Bamber, J. L., Tedstone, A. J., King, M. D., Howat, I. M., Enderlin, E. M., van den Broeke, M. R., & Noël, B. (2018). Land Ice Freshwater Budget of the Arctic and North Atlantic Oceans: 1. Data, Methods, and Results. *Journal of Geophysical Research: Oceans*, 123(3), 1827–1837. <https://doi.org/10.1002/2017JC013605>
- Braithwaite, R. J., Laternser, M., & Pfeffer, W. T. (1994). Variations of near-surface firn density in the lower accumulation area of the Greenland ice sheet, Pâkitsoq, West Greenland. *Journal of Glaciology*, 40(136), 477–485. <https://doi.org/10.3189/S002214300001234X>
- Cottier, F. R., Nilsen, F., Skogseth, R., Tverberg, V., Skardhamar, J., & Svendsen, H. (2010). Arctic fjords: A review of the oceanographic environment and dominant physical processes. *Geological Society Special Publication*, 344, 35–50. <https://doi.org/10.1144/SP344.4>
- Fettweis, X., Hofer, S., Krebs-Kanzow, U., Amory, C., Aoki, T., Berends, C. J., Born, A., Box, J. E., Delhasse, A., Fujita, K., Gierz, P., Goelzer, H., Hanna, E., Hashimoto, A., Huybrechts, P., Kapsch, M. L., King, M. D., Kittel, C., Lang, C., ... Zolles, T. (2020). GrSMBMIP: Intercomparison of the modelled 1980–2012 surface mass balance over the Greenland Ice Sheet. *Cryosphere*, 14(11), 3935–3958. <https://doi.org/10.5194/TC-14-3935-2020>
- Johnson, H. L., Münchow, A., Falkner, K. K., & Melling, H. (2011). Ocean circulation and properties in Petermann Fjord, Greenland. *Journal of Geophysical Research: Oceans*, 116(1). <https://doi.org/10.1029/2010JC006519>
- Karlsson, N. B., Mankoff, K. D., Solgaard, A. M., Larsen, S. H., How, P. R., Fausto, R. S., & Sørensen, L. S. (2022). *Greenland Freshwater Flux on Glacier-basin Scales*. GEUS Dataverse. <https://doi.org/10.22008/FK2/BOVBVR>
- Moon, T. A., Cohen, B., Black, T. E., Laidre, K. L., Stern, H. L., & Joughin, I. (2024). Characterizing southeast Greenland fjord surface ice and freshwater flux to support biological applications. *The Cryosphere*, 18(10), 4845–4872. <https://doi.org/10.5194/TC-18-4845-2024>
- Mouginot, J., Rignot, E., Bjørk, A. A., van den Broeke, M., Millan, R., Morlighem, M., Noël, B., Scheuchl, B., & Wood, M. (2019). Forty-six years of Greenland Ice Sheet mass balance from 1972 to 2018. *Proceedings of the National Academy of Sciences of the United States of America*, 116(19), 9239–9244. <https://doi.org/10.1073/PNAS.1904242116>
- Noël, B., van de Berg, W. J., Lhermitte, S., & van den Broeke, M. R. (2019). Rapid ablation zone expansion amplifies north Greenland mass loss. *Science Advances*, 5(9). <https://doi.org/10.1126/SCIADV.AAW0123/>
- Pfeffer, W. T., Meier, M. F., & Illangasekare, T. H. (1991). Retention of Greenland runoff by refreezing: Implications for projected future sea level change. *Journal of Geophysical Research: Oceans*, 96(C12), 22117–22124. <https://doi.org/10.1029/91JC02502>
- Sanchez, R., Slater, D., & Straneo, F. (2023). Delayed Freshwater Export from a Greenland Tidewater Glacial Fjord. *Journal of Physical Oceanography*, 53(5), 1291–1309. <https://doi.org/10.1175/JPO-D-22-0137.1>
- Slater, D. A., Felikson, D., Straneo, F., Goelzer, H., Little, C. M., Morlighem, M., Fettweis, X., & Nowicki, S. (2020). Twenty-first century ocean forcing of the Greenland ice sheet for

- modelling of sea level contribution. *Cryosphere*, 14(3), 985–1008.  
<https://doi.org/10.5194/TC-14-985-2020>
- Stuart-Lee, A. E., Mortensen, J., Kaaden, A. S. van der, & Meire, L. (2021). Seasonal Hydrography of Ameralik: A Southwest Greenland Fjord Impacted by a Land-Terminating Glacier. *Journal of Geophysical Research: Oceans*, 126(12).  
<https://doi.org/10.1029/2021JC017552>
- van Dalum, C. T., van de Berg, W. J., Gadde, S. N., van Tiggelen, M., van der Drift, T., van Meijgaard, E., van Ulf, L. H., & van den Broeke, M. R. (2024). First results of the polar regional climate model RACMO2.4. *The Cryosphere*, 18(9), 4065–4088.  
<https://doi.org/10.5194/tc-18-4065-2024>
- van Wessem, J. M., van den Broeke, M. R., Wouters, B., & Lhermitte, S. (2023). Variable temperature thresholds of melt pond formation on Antarctic ice shelves. *Nature Climate Change* 2023 13:2, 13(2), 161–166. <https://doi.org/10.1038/s41558-022-01577-1>
